# Supplementary material for: Optofluidic Raman-activated cell sorting for targeted genome retrieval or cultivation of microbial cells with specific functions
Source: Springer Nature journal article supplement (doi:10.1038/s41596-020-00427-8), 2020-12-11
Supplement: MOESM5 [file 41596_2020_427_MOESM5_ESM28.xlsx]

## Sheet: Fig.S2a
Raman shift (cm-1)	500.315	502.185	504.054	505.924	507.794	509.663	511.533	513.402	515.272	517.142	519.011	520.881	522.75	524.62	526.489	528.359	530.229	532.098	533.968	535.837	537.707	539.577	541.446	543.316	545.185	547.055	548.924	550.794	552.664	554.533	556.403	558.272	560.142	562.011	563.881	565.751	567.62	569.49	571.359	573.229	575.099	576.968	578.838	580.707	582.577	584.446	586.316	588.186	590.055
CCMP421	270.13	272.538	274.164	272.922	272.59	274.306	274.444	272.288	271.912	273.336	273.602	273.036	273.754	275.078	275.046	274.612	271.98	268.996	270.408	271.86	271.354	271.508	274.944	277.558	277.682	278.29	279.888	282.438	285.99	285.244	281.208	281.414	283.854	281.912	278.524	278.75	279.626	282.226	284.54	283.398	282.426	282.936	283.538	284.14	284.206	283.502	282.152	280.23	279.888
V. alginolyticus	36.4105	38.0538	35.5827	31.9527	32.5123	33.358	34.8067	35.3623	33.9136	32.9111	32.3813	32.8788	33.8968	33.8225	33.5286	32.5654	32.1424	33.8603	34.5784	33.6835	33.3195	33.3668	31.641	29.3119	31.2769	33.2756	32.9224	32.7086	32.8267	32.9905	33.2037	31.6303	29.1644	29.4527	30.1898	30.2818	30.4968	31.13	31.3789	31.0877	31.3912	32.084	31.3624	30.274	32.6227	34.0299	30.7512	29.2977	30.9926
[truncated: 1,289 more columns]

## Sheet: Fig.S2b
	Dimension 1	Dimension 2
Symbiodinium CCMP421	1351.55	1351.55
	1345.76	1345.76
	1446.53	1446.53
	1397.78	1397.78
	1361.51	1361.51
	1354.12	1354.12
	1388.06	1388.06
	1310	1310
	1364.39	1364.39
	1331.64	1331.64
	1353.96	1353.96
	1310	1310
	1365.33	1365.33
	1365.82	1365.82
	1370.79	1370.79
	1331.39	1331.39
	1329.7	1329.7
	1324.99	1324.99
	1336.97	1336.97
	1316	1316
V. alginolyticus	51	47.3403
	50	51.0839
	45	49.7436
	63	62.1049
	56	53.2354
	53	55.1678
	62	54.2482
	55	54.9452
	56	53.1806
	60	62.655
	48	48.3776
	71	65.7692
	69	69.5175
	61	60.6713
	61	61.134
	55	52.9417
	56	55.8112
	63	62.6772
	60	62.7098
	68	63.5547
	60	57.479
	56	57.0047
	49	51.9534
	63	63.6819
	60	59.5676
	67	67.8403
	55	52.2902
	44	46.4114
	73	71.8613
	61	60.7016
	58	56.3193
	53	54.4371
	59	60.5467
	63	59.2855
	59	59.2436
	51	57.4791
	53	50.7226
	58	62.5
	59	57.155
	58	58.408
	57	55.4837
	49	53.6888
	69	68.8904
	49	52.2518
	61	60.0501
	58	60.0886
	62	61.0805
	56	56.4324
	65	66.8998
	54	54
	56	57.4371
	59	56.7774
	60	61.1387
	69	70.2179
	59	57.7821
	68	68.5967
	63	61.5629
	68	64.4499
	55	54.9452
	51	49.8124
	64	59.4755
	60	60.8951
	59	60.845
	58	54.0723
	50	54.634
	48	56.2938
	67	63.3951
	61	58.887
	55	54.5128
	50	51.1935
	49	49.8648
	60	59.6468
	65	64.7808
	52	56.2017
	58	59.7355
	49	52.6293
	64	63.1352
	54	54.408
	52	55.4406
	55	58.4953

## Sheet: Fig.S2c
	Dimension 1	Dimension 2
Symbiodinium CCMP421	2932.59	3074.86
	3128.23	3226.73
	2494.39	2583.48
	2796.4	2899.71
	2327.66	2400.03
	2999.74	3074.31
	2501.44	2584.55
	2459.51	2530.35
	2402.99	2495.17
	2239.57	2328.18
	2339.29	2459.89
	2461.86	2544.72
	2639.97	2734.95
	2630.95	2737.98
	2499.78	2613.06
	2448.22	2517.11
	2444.6	2524.99
	2421.34	2535.38
	2576.51	2666.81
	2447.94	2541.91
V. alginolyticus	23.3726	23.7039
	27.5267	28.0719
	29.6711	27.6609
	35.4995	35.6426
	27.4922	27.9225
	30.8895	30.2201
	27.1054	25.3319
	27.5319	29.9083
	28.2575	27.5929
	38.7815	38.6642
	24.4434	23.498
	35.9583	36.1306
	40.9239	40.3695
	33.336	36.2825
	32.1697	30.9113
	27.0298	28.0417
	31.8844	28.1603
	36.8993	37.1641
	39.4619	35.5404
	41.48	37.9194
	29.6038	29.8057
	30.4897	29.6985
	29.7821	32.3929
	32.7147	29.6373
	38.1393	33.1409
	36.0853	35.4576
	23.6295	21.1798
	23.0761	23.6305
	37.9311	37.7012
	31.8894	31.8318
	23.9168	22.4261
	26.5006	25.7458
	31.7087	34.3747
	33.0416	34.0928
	27.8068	28.3749
	35.019	35.3828
	28.3315	31.5631
	40.1242	39.938
	27.3906	29.3062
	38.7127	37.7537
	25.6188	29.8095
	25.368	25.9845
	41.4434	41.1097
	25.0092	23.2154
	33.5605	31.4926
	38.5858	37.815
	40.3649	36.4201
	30.9285	29.4772
	40.1315	39.0464
	23.8232	24.1453
	29.0826	27.8452
	29.1813	29.1858
	35.1151	35.4993
	48.3746	47.1992
	32.6547	31.5021
	33.4435	31.8863
	35.2144	39.5685
	36.169	40.9835
	22.7009	22.3143
	27.5903	26.5344
	32.3973	30.6859
	32.5611	33.2213
	33.591	34.0397
	29.554	29.2779
	26.1398	25.093
	31.5586	30.3856
	34.4044	34.2409
	32.7127	32.3654
	30.7405	32.3001
	29.0534	30.1439
	26.3792	24.3069
	32.4065	29.5129
	34.2185	34.3358
	33.4234	33.6237
	40.6316	35.4517
	24.4096	26.0773
	31.7307	32.356
	24.9605	21.7908
	30.963	29.0149
	31.3473	30.9932
