# Supplementary material for: Optofluidic Raman-activated cell sorting for targeted genome retrieval or cultivation of microbial cells with specific functions
Source: Springer Nature journal article supplement (doi:10.1038/s41596-020-00427-8), 2020-12-11
Supplement: MOESM6 [file 41596_2020_427_MOESM6_ESM29.xlsx]

## Sheet: Fig.S3c
Focus position 1
Raman shift (cm-1)	403.109	405.334	407.559	409.781	412.004	414.227	416.449	418.671	420.89	423.111	425.331	427.551	429.77	431.988	434.204	436.422	438.638	440.855	443.069	445.284	447.499	449.713	451.927	454.138	456.351	458.563	460.774	462.983	465.194	467.404	469.613	471.82	474.028	476.236	478.444	480.648	482.855	485.06	487.263	489.468	491.672	493.876	496.077	498.279	500.481	502.681	504.882	507.082	509.282
0 min	397	409	403	416	413	420	399	405	422	400	416	420	423	417	418	423	438	428	412	402	403	413	419	406	398	396	406	382	377	402	386	376	396	382	397	389	404	373	401	380	416	408	405	410	400	414	419	387	399
30 min	423	425	429	437	423	426	435	435	433	434	452	432	457	424	437	448	436	438	436	427	437	442	435	410	423	410	420	423	405	424	432	398	402	410	413	402	436	424	422	447	422	414	442	465	451	453	426	415	441
60 min	438	462	454	448	454	448	472	463	465	461	481	467	457	475	469	477	472	471	480	450	454	466	476	469	444	450	439	456	440	449	442	444	454	463	440	452	443	448	457	474	459	473	493	484	480	483	483	489	500
90 min	483	498	502	493	521	494	521	517	526	526	520	528	503	538	523	516	521	511	523	518	512	528	518	489	498	491	496	503	496	485	499	510	487	491	503	504	532	511	520	516	549	532	532	558	543	537	545	545	563
120 min	518	522	496	517	519	545	526	559	536	532	529	523	552	542	549	530	555	534	576	557	547	521	541	529	524	532	521	503	534	522	494	538	516	520	511	535	548	541	539	539	579	575	576	590	570	567	585	611	566
150 min	544	556	559	564	599	580	575	579	579	588	575	572	590	589	622	581	584	603	629	611	593	601	595	592	603	594	601	582	578	584	581	568	588	567	589	580	601	616	629	619	613	627	633	647	655	654	652	648	652
Focus position 2
Raman shift (cm-1)	402.86	405.085	407.309	409.531	411.755	413.977	416.2	418.422	420.643	422.862	425.082	427.301	429.521	431.739	433.955	436.173	438.39	440.606	442.822	445.035	447.25	449.465	451.678	453.889	456.102	458.314	460.526	462.735	464.946	467.156	469.365	471.572	473.781	475.988	478.196	480.401	482.607	484.813	487.018	489.221	491.425	493.629	495.83	498.032	500.234	502.434	504.635	506.835	509.035
0 min	657	657	648	651	650	666	650	684	689	656	648	686	677	667	656	657.5	659	664	686	654	666	659	657	641	627	619	647	656	651	625	636	632	663	656	662	707	704	742	761	794	803	766	790	785	764	738	738	735	716
30 min	657	657	648	651	650	666	650	684	689	656	648	686	677	667	656	657.5	659	664	686	654	666	659	657	641	627	619	647	656	651	625	636	632	663	656	662	707	704	742	761	794	803	766	790	785	764	738	738	735	716
60 min	657	657	648	651	650	666	650	684	689	656	648	686	677	667	656	657.5	659	664	686	654	666	659	657	641	627	619	647	656	651	625	636	632	663	656	662	707	704	742	761	794	803	766	790	785	764	738	738	735	716
90 min	665	668	672	664	668	656	673	666	673	677	664	680	686	693	683	678	669	659	670	661	658	672	666	655	673	640	639	648	657	649	654	632	667	683	697	702	707	754	780	836	826	843	820	816	799	780	766	738	699
120 min	684	675	684	699	675	712	703	713	701	724	693	725	717	713	708	690	716	720	691	705	707	689	697	692	680	701	700	699	686	700	666	684	714	697	710	755	765	833	883	884	919	940	929	890	919	861	853	814	806
150 min	676	686	718	685	685	698	702	677	704	715	685	706	706	694	709	697	696	705	696	695	685	683	680	698	682	678	675	684	668	678	712	687	689	708	722	760	772	822	849	882	942	941	963	942	885	896	838	840	810
[truncated: 1,501 more columns]

## Sheet: Fig.S3d
Focus position 1
Raman shift (cm-1)	403.041	405.266	407.491	409.715	411.936	414.159	416.381	418.603	420.824	423.043	425.263	427.483	429.702	431.92	434.136	436.354	438.571	440.787	443.003	445.216	447.431	449.645	451.859	454.072	456.283	458.495	460.707	462.918	465.126	467.336	469.546	471.754	473.961	476.169	478.376	480.581	482.787	484.993	487.198	489.401	491.605	493.808	496.009	498.212	500.414	502.616	504.815	507.015	509.215
0 min	431	435	442	451	433	438	448	419	448	435	419	420	424	450	449	432	406	444	429	416	420	426	410	401	420	412	421	395	403	386	410	406	411	400	401	415	414	428	443	434	446	445	428	431	438	419	431	410	424
30 min	405	412	394	406	409	425	399	398	397	413	408	414	426	423	415	435	416	407	404	392	401	398	383	403	369	395	389	391	383	387	369	374	401	402	387	396	403	420	426	422	415	430	435	411	409	413	393	397	412
60 min	461	454	448	444	460	442	460	454	455	468	454	478	461	463	460	442	440	466	422	446	451	419	437	439	453	433	444	429	421	429	428	401	446	419	426	431	428	420	446	450	449	472	461	470	449	466	441	429	447
90 min	458	476	458	454	462	475	445	458	461	452	454	454	453	457	463	468	479	454	454	468	429	425	441	449	445	437	438	427	432	426	427	429	441	432	443	421	433	438	464	469	457	466	473	450	448	459	451	441	466
120 min	458	476	458	454	462	475	445	458	461	452	454	454	453	457	463	468	479	454	454	468	429	425	441	449	445	437	438	427	432	426	427	429	441	432	443	421	433	438	464	469	457	466	473	450	448	459	451	441	466
150 min	461	438	469	473	462	463	452	475	477	481	463	468	466	482	464	472	449	471	460	466	468	452	451	448	431	442	445	446	428	415	430	436	455	436	418	441	429	473	464	453	460	467	477	460	477	468	476	461	451
Focus position 2
Raman shift (cm-1)	403.041	405.266	407.491	409.715	411.936	414.159	416.381	418.603	420.824	423.043	425.263	427.483	429.702	431.92	434.136	436.354	438.571	440.787	443.003	445.216	447.431	449.645	451.859	454.072	456.283	458.495	460.707	462.918	465.126	467.336	469.546	471.754	473.961	476.169	478.376	480.581	482.787	484.993	487.198	489.401	491.605	493.808	496.009	498.212	500.414	502.616	504.815	507.015	509.215
0 min	486	499	514	504	509	491	508	507	514	497	483	508	486	516	482	500	519	506	505	504	475	486	486	482	479	472	480	503	490	488	487	489	493	497	498	537	565	581	635	657	634	674	659	653	628	606	573	563	548
30 min	541	559	553	546	559	544	538	571	554	546	572	554	577	545	570	550	556	564	556	555	533	548	543	563	530	540	533	534	516	541	556	549	553	555	583	579	615	615	681	684	690	668	662	651	614	605	607	604	557
60 min	623	607	616	641	611	628	654	615	630	635	644	622	617	629	613	619	610	624	630	631	630	623	611	600	621	594	597	601	600	592	614	612	587	613	621	636	664	656	714	703	714	715	725	731	665	681	661	661	612
90 min	623	607	616	641	611	628	654	615	630	635	644	622	617	629	613	619	610	624	630	631	630	623	611	600	621	594	597	601	600	592	614	612	587	613	621	636	664	656	714	703	714	715	725	731	665	681	661	661	612
120 min	492	465	490	492	496	508	481	487	488	499	488	490	492	499	488	489	504	497	470	491	485	498	474	470	465	458	462	481	477	463	470	469	487	491	519	527	564	589	640	653	655	666	639	646	610	583	572	570	540
150 min	458	484	498	495	488	492	503	499	497	496	487	489	506	483	494	474	501	501	492	506	500	468	473	489	471	472	467	458	460	467	471	504	498	520	517	542	598	615	676	724	735	727	732	702	688	639	616	596	577
[truncated: 1,501 more columns]
